# Supplementary material for: Effect of oxidation on cellulose and water structure: a molecular dynamics simulation study
Source: Springer Nature journal article supplement (doi:10.1007/s10570-021-03751-8), 2021-03-03
Supplement: MOESM1 [file 18926536]

# Supporting Information

## Effect of oxidation on cellulose and water structure: a molecular dynamics simulation study

Sathish Kumar Mudedla<sup>a</sup>, Maisa Vuorte<sup>a</sup>, Elias Veijola<sup>b</sup>, Kaisa Marjamaa<sup>c</sup>,  
Anu Koivula<sup>c</sup>, Markus B. Linder<sup>b</sup>, Suvi Arola<sup>b,d</sup>, Maria Sammalkorpi<sup>a,b,\*</sup>

<sup>a</sup>*Department of Chemistry and Materials Science, School of Chemical Engineering, Aalto University, P.O. Box 16100, FI-00076 Aalto, Finland*

<sup>b</sup>*Department of Bioproducts and Biosystems, School of Chemical Engineering, Aalto University, P.O. Box 16100, FI-00076 Aalto, Finland*

<sup>c</sup>*VTT Technical Research Centre of Finland Ltd., Industrial Biotechnology and Food Solutions, Solutions for Natural Resources and Environment, Espoo, Finland*

<sup>d</sup>*VTT Technical Research Centre of Finland Ltd., Biomass Processing and Products, Solutions for Natural Resources and Environment, Espoo, Finland*

---

The Supporting Information consists of root mean square deviation (RMSD) of the cellulose crystal coordinates calculated from the simulations (Figure S1), a zoom of main manuscript Figure 11 cellobionic acid (DP2ox) and cellohexaose (DP6) peak region, and the full chromatogram data set.

---

\*Corresponding author

*Email address:* maria.sammalkorpi@aalto.fi (Maria Sammalkorpi)

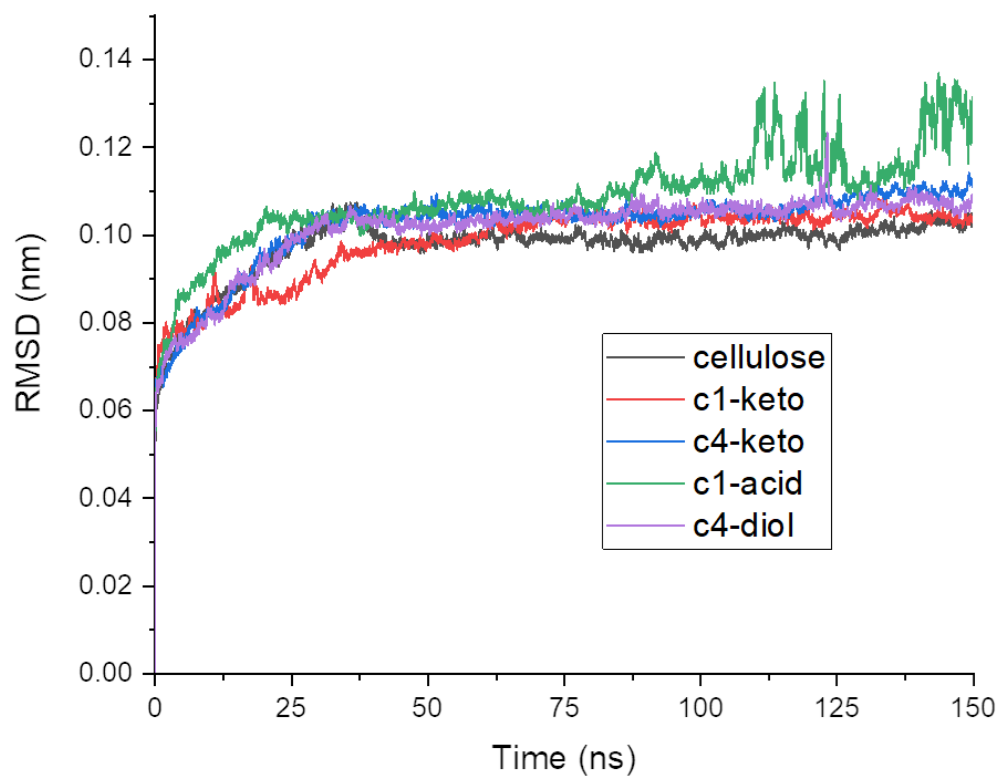

Figure S1: Root mean square deviation (RMSD) of intact and oxidized cellulose crystals in the molecular dynamics simulations.

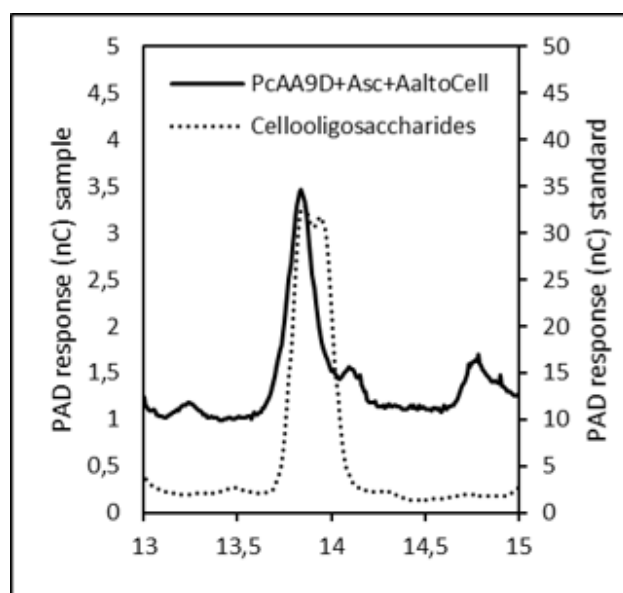

Figure S2: Zoom corresponding to main manuscript Figure 11 cellobionic acid (DP2ox) and cellohexaose (DP6) peak region.

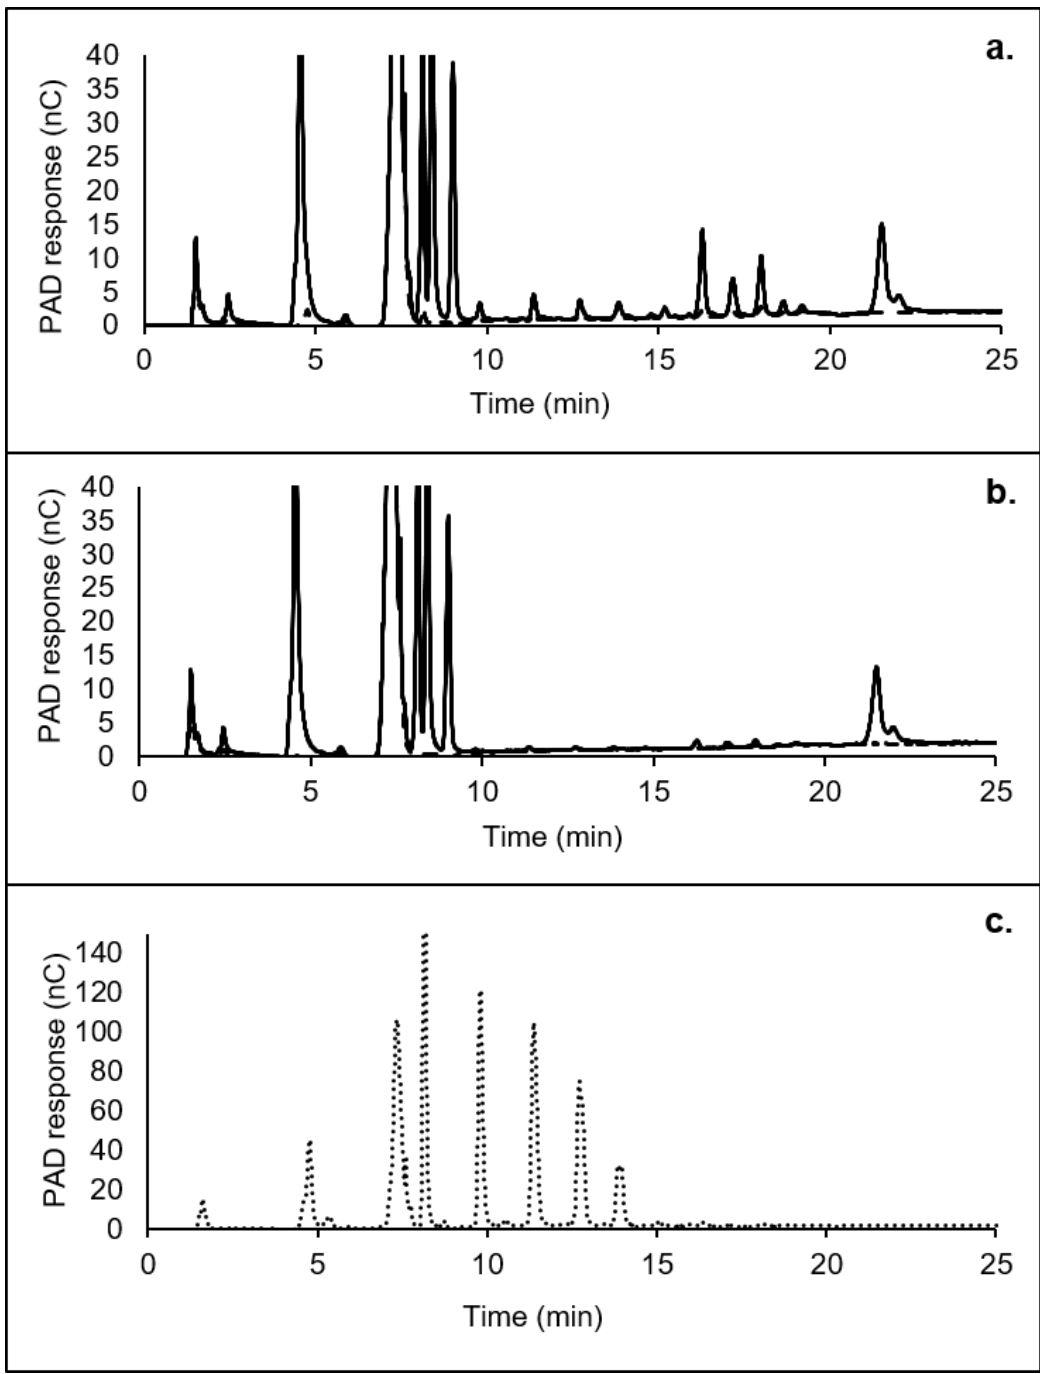

Figure S3: Full chromatogram data set.
